# Supplementary material
Source: publisher site journal article supplement (https://www.dovepress.com/article/425122)
Supplement: Supplementary file 1 [file get_supplementary_file.php]

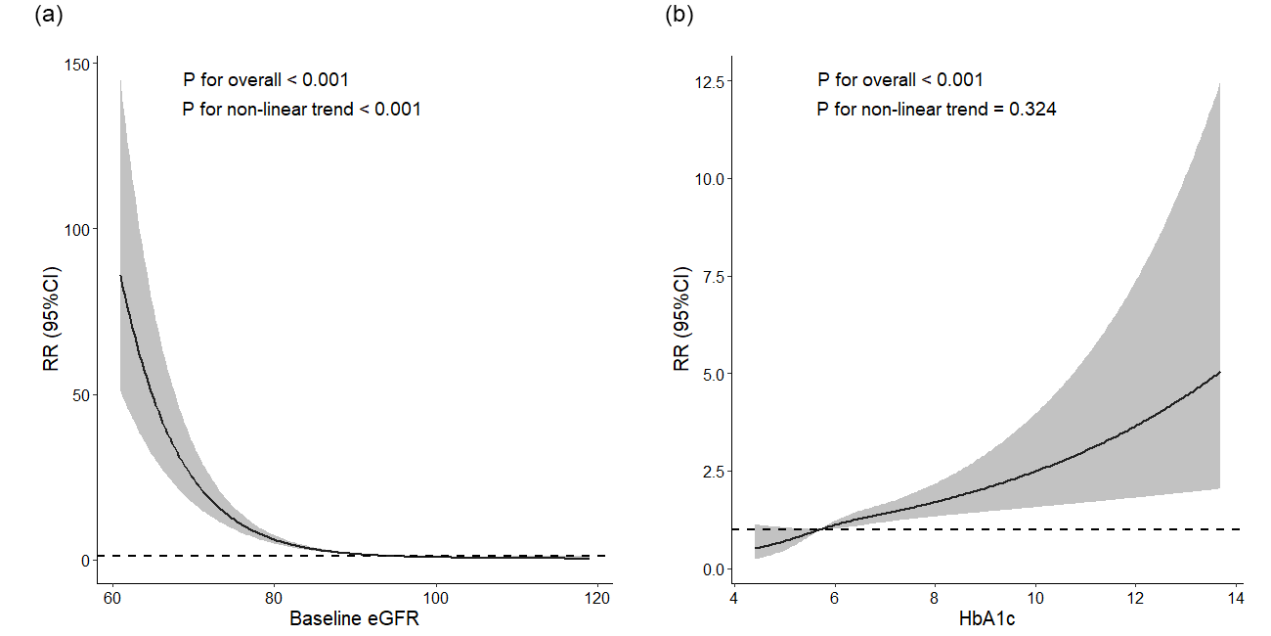


Supplementary Figure 1. The relationship between baseline eGFR (a) and HbA1c (b) and 3-year risks of CKD. The dark lines represent the risk ratio (RR) and the shaded areas represent the 95% confidence intervals.
